# Supplementary material
Source: publisher site journal article supplement (https://www.kjim.org/upload/media/kjim-2025-246-Supplementary-Table-1.pdf)
Supplement: Supplementary file 1 [file kjim-2025-246-Supplementary-Table-1.pdf]

**Supplementary Table 1. Comparison of neutralizing antibody titers (NT50) against SARS-CoV-2 original D614G, Omicron BA.4/5, and XBB.1.5 variants before and after bivalent vaccination**

|                         | Group A                                          |              |                     | Group B                                       |               |                     | Group C                                      |              |              | p value |         |
|-------------------------|--------------------------------------------------|--------------|---------------------|-----------------------------------------------|---------------|---------------------|----------------------------------------------|--------------|--------------|---------|---------|
|                         | Omicron-infected, bivalent unvaccinated (n = 39) |              |                     | Omicron-infected bivalent vaccinated (n = 23) |               |                     | Infection-naïve bivalent vaccinated (n = 17) |              |              | A vs. B | B vs. C |
|                         | GMT (95% CI)                                     | Median (IQR) | Median (IQR)        | GMT (95% CI)                                  | Median (IQR)  | Median (IQR)        | GMT (95% CI)                                 | Median (IQR) | Median (IQR) | A vs. B | B vs. C |
| <b>Original D614G</b>   |                                                  |              |                     |                                               |               |                     |                                              |              |              |         |         |
| Before bivalent         | 125.9 (75.68–209.5)                              | 90 (30–270)  | 70.11 (43.66–112.6) | 70.11 (43.66–112.6)                           | 90 (30–135)   | 27.57 (15.55–48.87) | 30 (10–90)                                   | 0.122        | 0.022        | 0.001   | 0.001   |
| 3 months after bivalent | 70.09 (42.12–116.6)                              | 90 (30–225)  | 177.7 (115.3–273.8) | 177.7 (115.3–273.8)                           | 270 (90–270)  | 224.8 (74.31–680.2) | 180 (90–810)                                 | 0.010        | 0.671        | 0.052   | 0.052   |
| 6 months after bivalent | 29.48 (4.733–183.6)                              | 60 (23–90)   | 78.45 (48.94–125.8) | 78.45 (48.94–125.8)                           | 90 (30–90)    | 76.93 (22.38–264.4) | 90 (30–90)                                   | 0.303        | > 0.99       | 0.425   | 0.425   |
| <b>BA.4/5</b>           |                                                  |              |                     |                                               |               |                     |                                              |              |              |         |         |
| Before bivalent         | 160.7 (99.20–260.4)                              | 270 (45–270) | 94.16 (48.18–184.0) | 94.16 (48.18–184.0)                           | 90 (30–270)   | 15.01 (5.65–39.90)  | 10 (10–60)                                   | 0.231        | 0.001        | < 0.001 | < 0.001 |
| 3 months after bivalent | 153.6 (89.81–262.6)                              | 270 (30–270) | 369.6 (258.2–529.0) | 369.6 (258.2–529.0)                           | 270 (270–810) | 142.2 (63.10–320.7) | 180 (90–270)                                 | 0.015        | 0.025        | 0.987   | 0.987   |
| 6 months after bivalent | 24.98 (15.60–40.0)                               | 30 (25–30)   | 118.4 (65.96–212.7) | 118.4 (65.96–212.7)                           | 90 (90–225)   | 56.20 (20.85–151.5) | 90 (30–90)                                   | 0.001        | 0.212        | 0.127   | 0.127   |
| <b>XBB.1.5</b>          |                                                  |              |                     |                                               |               |                     |                                              |              |              |         |         |
| Before bivalent         | 45.99 (32.50–65.09)                              | 30 (30–90)   | 31.54 (22.94–43.35) | 31.54 (22.94–43.35)                           | 30 (30–45)    | 13.91 (7.772–24.89) | 10 (10–30)                                   | 0.265        | 0.012        | < 0.001 | < 0.001 |
| 3 months after bivalent | 36.93 (27.44–49.70)                              | 30 (30–30)   | 81.06 (49.28–133.3) | 81.06 (49.28–133.3)                           | 90 (30–270)   | 27.38 (17.17–43.65) | 30 (15–30)                                   | 0.003        | 0.005        | 0.339   | 0.339   |
| 6 months after bivalent | 14.42 (7.952–26.16)                              | 10 (10–30)   | 32.13 (22.97–44.96) | 32.13 (22.97–44.96)                           | 30 (30–30)    | 18.73 (8.423–41.67) | 10 (10–30)                                   | 0.021        | 0.114        | 0.837   | 0.837   |

GMT, geometric mean titer; CI, confidence interval; IQR, interquartile range.
